# Supplementary material for: Mixed-metal chalcogenide tetrahedral clusters with an exo-polyhedral metal fragment
Source: Royal Society of Chemistry journal article supplement (doi:10.1039/c4dt02329c), 2014-01-01
Supplement: c4dt02329c1.pdf [file c4dt02329c1.pdf]

## Supporting Information

### Mixed-Metal Chalcogenide Tetrahedral Clusters with an *Exo*-polyhedral Metal Fragment

K. Yuvaraj,<sup>a</sup> Dipak Kumar Roy,<sup>a</sup> V. P. Anju,<sup>a</sup> Bijñaneswar Mondal,<sup>a</sup> Babu Varghese<sup>b</sup> and Sundargopal Ghosh<sup>a</sup> \*

<sup>a</sup>Department of Chemistry, Indian Institute of Technology Madras, Chennai 600 036, India.

<sup>b</sup>Sophisticated Analytical Instruments Facility, Indian Institute of Technology Madras, Chennai 600 036, India.

Email: [sghosh@iitm.ac.in](mailto:sghosh@iitm.ac.in)

#### I. Supplementary Data

- I.1 Fig. S1 Crystal packing diagrams for **3** and **5**.
- I.2 Fig. S2 Proposed molecular structure of **4**

#### I.1 Fig. S1: Crystal packing diagram of **3** and **5**:

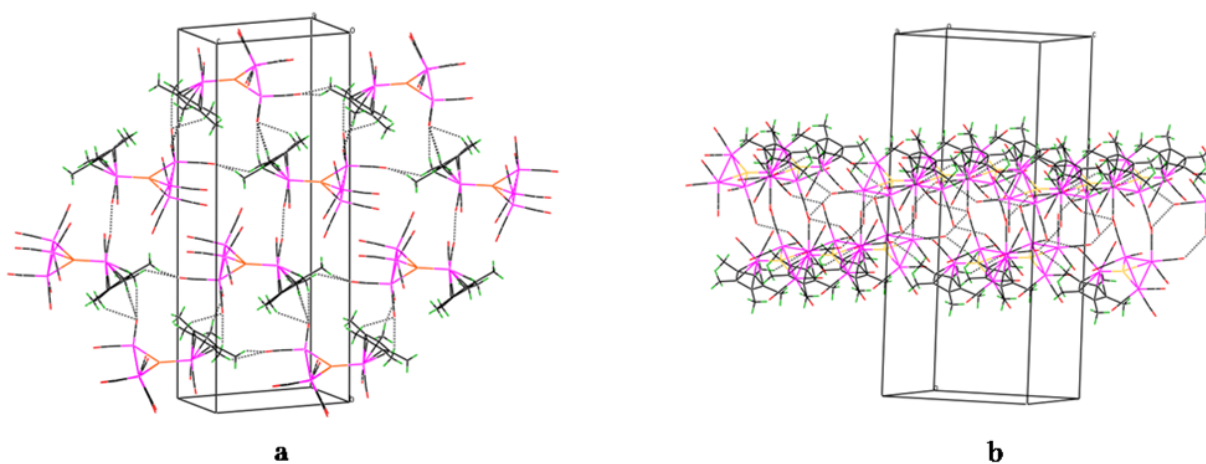

**Fig. S1.** (a) Crystal packing diagram of **3** linked through C-H...O interactions. (b) Crystal packing diagram of **5** linked through C-H...O interactions.
